# Supplementary material for: Astrocyte-Derived TGFβ1 Facilitates Blood–Brain Barrier Function via Non-Canonical Hedgehog Signaling in Brain Microvascular Endothelial Cells
Source: PubMed Central journal article supplement (PMC7826596; doi:10.3390/brainsci11010077), 2021-01-08
Supplement: brainsci-11-00077-s001.pdf [file brainsci-11-00077-s001.pdf]

## Supplemental Figures

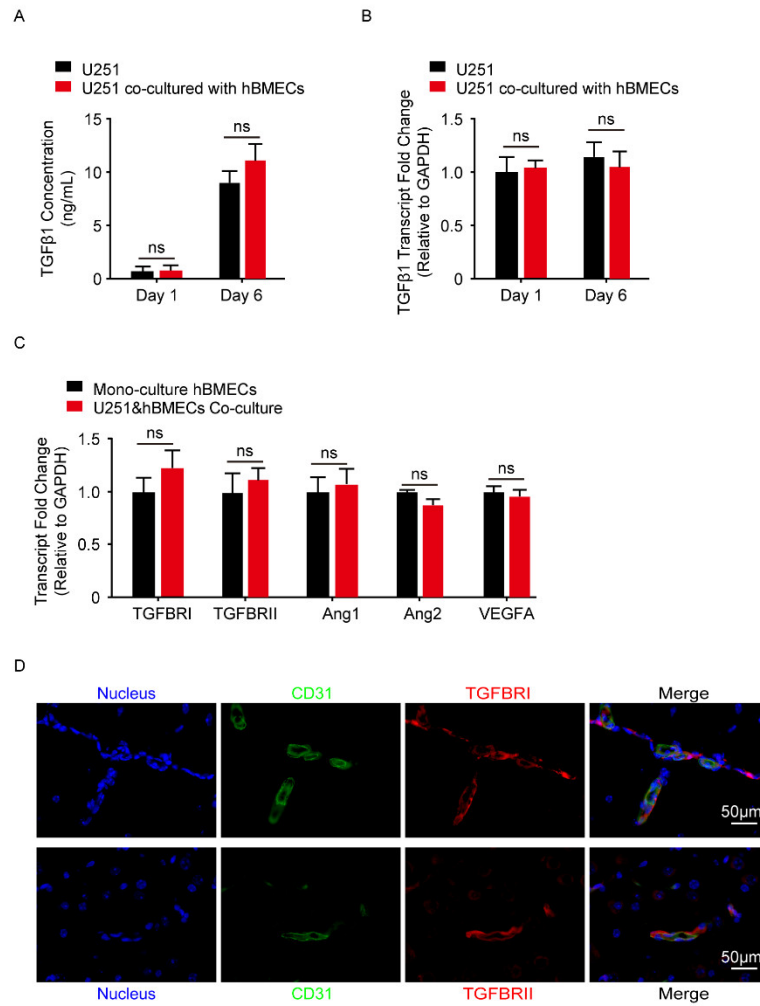

**Figure S1.** TGFβ1 as well as TGFβRI/II expression in BMECs. (A) ELISA detection of TGFβ1 concentration in U251 with or without hBMECs co-cultivation at Day1 and Day6. ns, no significance. (B) qPCR detecting the TGFβ1 transcription in U251 with or without hBMECs co-cultivation at Day1 and Day6. ns, no significance. (C) qPCR detected the TGFβRI, TGFβRII, Ang1, Ang2, and VEGFA transcription in hBMECs under mono-culture condition or co-culture condition. ns, no significance. (D) The expression of TGFβRI/II on BMECs of the mice via IF. BMECs were marked with CD31 in green. Scale bars indicated 50μm.

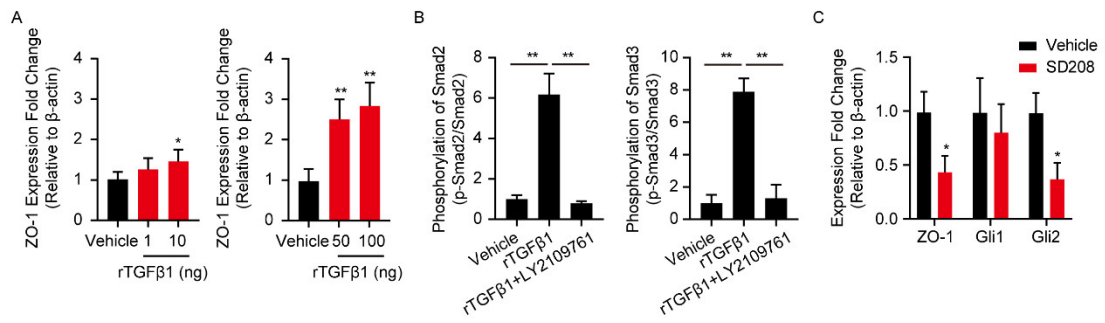

**Figure S2.** Quantitative analyses of the Western blots. (A) Quantitative analysis of the blots in Figure 2C.  $**p < 0.01$ . (B) Quantitative analysis of the blots in Figure 2F.  $**p < 0.01$ . (C) Quantitative analysis of the blots in Figure 2G.  $**p < 0.01$ .

A

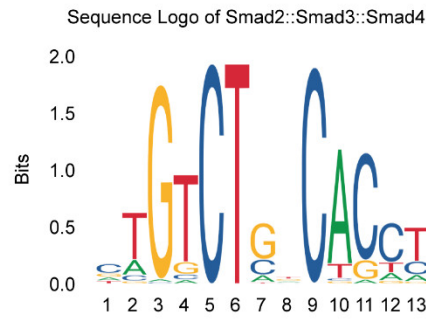

B

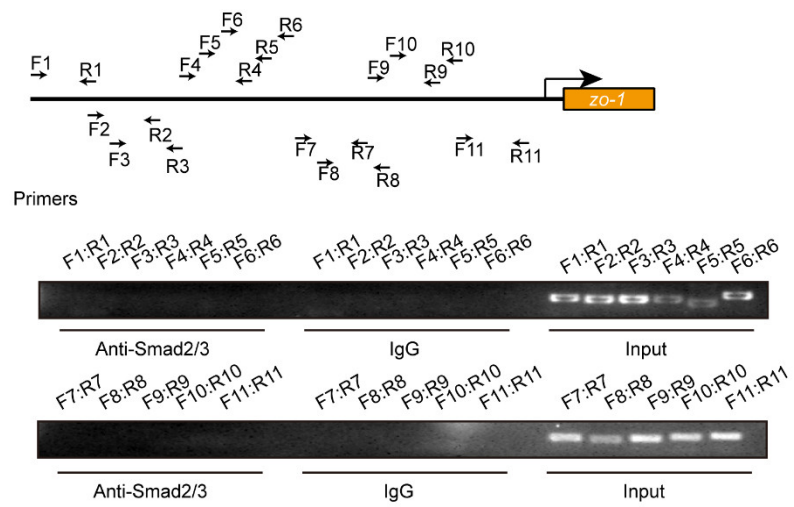

**Figure S3.** Detection of Smad2/3 interacting with *zo-1* promoter. (A) The sequence logo of the Smad2/3/4 binding motif. (B) Schematic showing a series of Smad2/3 primers binding as well as amplification on the *zo-1* promoter region during the ChIP-PCR process. The ChIP procedure was performed with anti-Smads antibody. Rabbit IgG was set as the negative control, and Input was the positive control without IP.

Supplemental Tables

**Table S1.** Primers used for the qPCR assays.

| Primer name      | Sequence (5' to 3')     |
|------------------|-------------------------|
| <i>zo-1</i> -F   | GACTTAAAGCTGCCTCAACAGA  |
| <i>zo-1</i> -R   | GGTTTGTTTCAGGCGAAAGG    |
| <i>ocln</i> -F   | TTAACCTTCGCCTGTGGAT     |
| <i>ocln</i> -R   | AGTGATCTTGCTCTGTTCT     |
| <i>tgfbr1</i> -F | ACGGCGTTACAGTGTTTCTG    |
| <i>tgfbr1</i> -R | GCACATACAAACGGCCTATCTC  |
| <i>tgfbr2</i> -F | GTAGCTCTGATGAGTGCAATGAC |
| <i>tgfbr2</i> -R | CAGATATGGCAACTCCCAGTG   |
| <i>ang1</i> -F   | AGCGCCGAAGTCCAGAAAAC    |
| <i>ang1</i> -R   | TACTCTCACGACAGTTGCCAT   |
| <i>ang2</i> -F   | AACTTTCGGAAGAGCATGGAC   |
| <i>ang2</i> -R   | CGAGTCATCGTATTCGAGCGG   |
| <i>vegfa</i> -F  | TGCCTTGCTGCTCTACCT      |
| <i>vegfa</i> -R  | GACATCCATGAACTTCACCACTT |
| <i>gli1</i> -F   | GCTAGAGTCCAGAGGTTT      |
| <i>gli1</i> -R   | GTGGTGAGTAGACAGAGG      |
| <i>gli2</i> -F   | AGCAGCAGCAACTGTCTGAGTGA |
| <i>gli2</i> -R   | GACCTTGCTGCGCTTGTGAA    |
| <i>gapdh</i> -F  | CAACAGCCTCAAGATCATCAG   |
| <i>gapdh</i> -R  | GAGTCCTTCCACGATACCA     |

**Table S2** Primers for CDSs cloning and Promotor region amplification in the dual-luciferase reporter assays.

| Primer name              | Sequence (5' to 3')                              |
|--------------------------|--------------------------------------------------|
| Smad2-CDS-F              | CGGGGTACCCATGTCGTCCATCTTGCCATTC                  |
| Smad2-CDS-R              | CCGGAATTCTGATGAGACCTCAAGTGCTGTT                  |
| Smad3-CDS-F              | CGGGGTACCAGCCATGTCGTCCATCCTG                     |
| Smad3-CDS -R             | CCGGAATTCACAATGGGTTGAGTAGAGTTCC                  |
| Gli1-CDS -F              | CCCAAGCTTATGTTCAACTCGATGACCCAC                   |
| Gli1-CDS -R              | GATATCTTAGGCACTAGAGTTGAGGAATTCTG                 |
| Gli2-CDS -F              | CCCAAGCTTATGGAGACGTCTGCCTCAGCC                   |
| Gli2-CDS -R              | CCGGAATTCCTAGGTCATCATGTTTCAGGAACCTG              |
| zo-1-promo-F             | CGGGGTACCGGTACCACAGGCACGCGC                      |
| zo-1-promo-R             | CCGCTCGAGCTCGAGAGCAGCACCCGTG                     |
| gli2-promo-F             | CGGGGTACCCTCCAGGTGCCAGCCAAAA                     |
| gli2-promo-R             | CCCAAGCTTTCCATCTCAGCCGCTCATC                     |
| gli2-promo truncation1-F | CGGGGTACCAGCTACTCAGGATTGCAGGAG                   |
| gli2-promo truncation1-R | CCCAAGCTTTCCATCTCAGCCGCTCATC                     |
| gli2-promo truncation2-F | CGGGGTACCGCCACTTTCCATCCCTCCTTAT                  |
| gli2-promo truncation2-R | CCCAAGCTTTCCATCTCAGCCGCTCATC                     |
| gli2-promo truncation3-F | CGGGGTACCTACTCAAAGAAGCCAGCCTCCT                  |
| gli2-promo truncation3-R | CCCAAGCTTTCCATCTCAGCCGCTCATC                     |
| gli2-promo truncation4-F | CGGGGTACCCCGCCACTCATATCAGTAGGAA                  |
| gli2-promo truncation4-R | CCCAAGCTTTCCATCTCAGCCGCTCATC                     |
| zo-1-promo truncation1-F | CGGGGTACCACCATTGTCTAAAGCCTGATGT                  |
| zo-1-promo truncation1-R | CCGCTCGAGCTCGAGAGCAGCACCCGTG                     |
| zo-1-promo truncation2-F | CGGGGTACCGAACGAGAGCAACGCTTCTGAC                  |
| zo-1-promo truncation2-R | CCGCTCGAGCTCGAGAGCAGCACCCGTG                     |
| zo-1-promo truncation3-F | CGGGGTACCACGGCAGCGGAACTGTCTT                     |
| zo-1-promo truncation3-R | CCGCTCGAGCTCGAGAGCAGCACCCGTG                     |
| gli2-promo mutation 1-R  | TGGCCGGTCCACGCTTAGTTTCGTTCCCATTAGGGTCGTGAAAT     |
| gli2-promo mutation 2-F  | GCAGGAGAATCACTTGAGCCGCTAAAAATTAGGTTGCGGTGAGCC    |
| gli2-promo mutation2-R   | CGTCTCTTAGTGAACCTCGGCGATTTTTAATCCAACGCCACTCGG    |
| gli2-promo mutation3-F   | CCAGCCTGGGCAACGCCGTTTCGATTGCAGCTCAAAAACAAACA     |
| gli2-promo mutation3-R   | GGTCGGACCCGTTGCGGCAAGCGTAACGTCGAGTTTTTGTGTTGT    |
| gli2-promo mutation4-F   | ACTTTCCATCCCTCCTCGAATCGCGCGTAGCCTGGTCTGTTGG      |
| gli2-promo mutation4-R   | TGAAAGGTAGGGAGGAGCTTAGCGCGCATCGGACCAGACAACC      |
| gli2-promo mutation5-F   | AAAATATGTTGACTGAGTATAGCTTGCTGCTAAAGGATGAACATTTAT |
| gli2-promo mutation5-R   | TTTTATACTGACTCATATCGAACGGACGATTCCTACTTGTAATA     |
| gli2-promo mutation6-F   | GTGAGGTCGTTTCAGAGCATGCGTCAAATCCCAGGACTAATAA      |
| gli2-promo mutation6-R   | CACTCCAGCAAGTCTCGTACGCAGTTTAGGGTCCTGATTATT       |
| zo-1-promo mutation1-F   | GTTTCACCATATTGGCCGATGTAGCGGTAAACTCCTGACCTCG      |
| zo-1-promo mutation1-R   | CGAGGTCAGGAGTTTACCGCTACATCGGCAATATGGTGAAAC       |
| zo-1-promo mutation2-F   | GGATTACAGGCGTGATTCTGCATACTTGCCCACAATTCTTA        |
| zo-1-promo mutation2-R   | TAAGAATTGTGGCCAAGTATGCAGGAATCACGCCTGTAATCC       |

---

|                                |                                         |
|--------------------------------|-----------------------------------------|
| <i>zo-1</i> -promo mutation3-F | CGCGGTGACAGCCCGATGTAGCGGTTTTGCCAGTGAAGG |
| <i>zo-1</i> -promo mutation3-R | CCTTCACTGGGCAAACCGCTACATCGGGCTGTCACCGCG |
| <i>zo-1</i> -promo mutation4-F | CGGGCCGGCAGGTTTCCTGCATACTGAGTTGCCGGCGC  |
| <i>zo-1</i> -promo mutation4-R | GCGCCGGCAACTCAAGTATGCAGGAAACCTGCCGGCCCG |

---

**Table S3.** Primers used in ChIP-PCR/qPCR assays.

| Primer name                | Sequence (5' to 3')    |
|----------------------------|------------------------|
| ChIP-Smad $\times$ gli2-F  | GCCACTCATATCAGTAGGA    |
| ChIP-Smad $\times$ gli2-R  | GGATTCGTCCTGGTCTTCT    |
| ChIP-Gli $\times$ zo-1-F1  | CAAGATGTGTGGCACTTC     |
| ChIP-Gli $\times$ zo-1-R1  | CAGGCTTTAGACAATGGTTT   |
| ChIP-Gli $\times$ zo-1-F2  | GTGGCACTATAACCAGATACT  |
| ChIP-Gli $\times$ zo-1-R2  | CCTAGACTCACTAATCTACACT |
| ChIP-Gli $\times$ zo-1-F3  | GATGTTACTAAGGATTTCTGGC |
| ChIP-Gli $\times$ zo-1-R3  | GGCTTTGCTAAACACCAA     |
| ChIP-Gli $\times$ zo-1-F4  | TTTAGCAAAGCCGTCAAC     |
| ChIP-Gli $\times$ zo-1-R4  | TGTCCCTCCAACCTCAAAG    |
| ChIP-Gli $\times$ zo-1-F5  | CTTTGAGTTGGAGGGACA     |
| ChIP-Gli $\times$ zo-1-R5  | GCCATCAAGATTGCTGAA     |
| ChIP-Gli $\times$ zo-1-F6  | CGTTCGGTCAACAAGAATT    |
| ChIP-Gli $\times$ zo-1-R6  | CCTGAGAAACACCCTAGAG    |
| ChIP-Gli $\times$ zo-1-F7  | TCTTGAGGTCTAATGTGGG    |
| ChIP-Gli $\times$ zo-1-R7  | AAGGCTGAAACTGGTGAT     |
| ChIP-Gli $\times$ zo-1-F8  | ACCTCATCACCAGTTTCA     |
| ChIP-Gli $\times$ zo-1-R8  | CGTCATGGCTTTCATCTC     |
| ChIP-Gli $\times$ zo-1-F9  | GAAACAACCTGTCGGGTATC   |
| ChIP-Gli $\times$ zo-1-R9  | GAGACTTGTCCTTGGCT      |
| ChIP-Gli $\times$ zo-1-F10 | AGATGAAAGCCATGACGC     |
| ChIP-Gli $\times$ zo-1-R10 | CGATACCCGACAGTTGTT     |
| ChIP-Gli $\times$ zo-1-F11 | GGACAAGTCTCTTAAGGAAAG  |
| ChIP-Gli $\times$ zo-1-R11 | CGGGTAACCCAAGTAACT     |
